# Supplementary material
Source: publisher site journal article supplement (http://kjim.org/upload/media/kjim-2023-307-Supplementary-Table-3.pdf)
Supplement: Supplementary file 1 [file kjim-2023-307-Supplementary-Table-3.pdf]

**Supplementary Table 3. Baseline characteristics of the NSTEMI group stratified by the time to presentation**

| Characteristic             | Early presenters   |                   | Late presenters  |                  | p value | p value (36–48 h vs. ≥ 48 h) |
|----------------------------|--------------------|-------------------|------------------|------------------|---------|------------------------------|
|                            | < 24 h (n = 1,691) | 24–36 h (n = 167) | 36–48 h (n = 48) | ≥ 48 h (n = 481) |         |                              |
| Male patients              | 1,145 (67.7)       | 89 (53.3)         | 32 (66.7)        | 304 (63.2)       | 0.041   | 0.634                        |
| Age, yr                    | 65.59 ± 11.20      | 67.90 ± 10.18     | 66.19 ± 11.16    | 68.57 ± 10.58    | < 0.001 | 0.140                        |
| Age ≥ 75 yr                | 396 (23.4)         | 51 (30.5)         | 15 (31.3)        | 159 (33.1)       | < 0.001 | 0.800                        |
| EMS utilization            | 240 (14.2)         | 9 (5.4)           | 2 (4.2)          | 21 (4.4)         | < 0.001 | > 0.999                      |
| Killip III–IV              | 245 (14.5)         | 27 (16.2)         | 5 (10.4)         | 81 (16.8)        | 0.251   | 0.250                        |
| BMI ≥ 25 kg/m <sup>2</sup> | 598 (36.1)         | 51 (31.5)         | 15 (32.6)        | 175 (37.4)       | 0.741   | 0.521                        |
| Previous history           |                    |                   |                  |                  |         |                              |
| Hypertension               | 1,107 (65.5)       | 128 (76.6)        | 31 (64.6)        | 342 (71.1)       | 0.016   | 0.345                        |
| DM                         | 1,428 (84.4)       | 152 (91.0)        | 43 (89.6)        | 433 (90.0)       | 0.001   | 0.923                        |
| Dyslipidemia               | 252 (14.9)         | 26 (15.6)         | 5 (10.4)         | 78 (16.2)        | 0.570   | 0.292                        |
| Prior IHD                  | 464 (27.4)         | 37 (22.2)         | 11 (22.9)        | 117 (24.3)       | 0.128   | 0.828                        |
| Prior CVA                  | 169 (10.1)         | 20 (12.0)         | 9 (18.8)         | 51 (10.7)        | 0.444   | 0.097                        |
| Smoking                    | 879 (53.4)         | 61 (37.4)         | 27 (56.3)        | 230 (49.1)       | 0.076   | 0.348                        |
| Family history of IHD      | 104 (6.3)          | 11 (6.9)          | 1 (2.1)          | 17 (3.7)         | 0.026   |                              |
| LVEF, %                    | 51.98 ± 12.23      | 52.19 ± 11.54     | 54.71 ± 9.92     | 50.14 ± 13.00    | 0.010   | 0.005                        |
| LVEF < 40%                 | 257 (15.8)         | 24 (14.9)         | 4 (8.5)          | 99 (21.3)        | 0.013   | 0.036                        |
| Use of PCI                 | 1,388 (82.1)       | 139 (83.2)        | 42 (87.5)        | 401 (83.4)       | 0.420   | 0.459                        |
| DBT strata, h              |                    |                   |                  |                  | 0.041   | 0.490                        |
| < 1.5                      | 80 (5.8)           | 10 (7.2)          | 2 (4.8)          | 18 (4.5)         |         |                              |
| 1.5–24                     | 933 (67.4)         | 87 (62.6)         | 29 (69.0)        | 255 (63.6)       |         |                              |
| ≥ 24                       | 372 (26.9)         | 42 (30.2)         | 11 (26.2)        | 128 (31.9)       |         |                              |
| Femoral approach           | 743 (53.5)         | 71 (51.1)         | 22 (52.4)        | 195 (48.6)       | 0.084   | 0.746                        |
| GPIIb/IIIa inhibitors      | 105 (7.6)          | 10 (7.2)          | 2 (4.8)          | 30 (7.5)         | 0.865   | 0.756                        |
| Thrombus aspiration        | 143 (10.3)         | 10 (7.2)          | 2 (4.8)          | 26 (6.5)         | 0.012   | > 0.999                      |
| Image-guided PCI           | 338 (24.4)         | 36 (25.9)         | 13 (31.0)        | 82 (20.4)        | 0.169   | 0.115                        |
| IRA                        |                    |                   |                  |                  | 0.196   | 0.142                        |
| LMCA                       | 41 (3.0)           | 6 (4.3)           | 4 (9.5)          | 14 (3.5)         |         |                              |
| LAD                        | 566 (40.8)         | 57 (41.0)         | 9 (21.4)         | 192 (47.8)       |         |                              |
| LCX                        | 368 (26.6)         | 37 (26.6)         | 13 (31.0)        | 75 (18.7)        |         |                              |
| RCA                        | 411 (29.7)         | 39 (28.1)         | 16 (38.1)        | 121 (30.1)       |         |                              |
| ACC/AHA lesion types       |                    |                   |                  |                  | 0.804   | 0.490                        |
| B2/C lesion                | 1,179 (85.1)       | 118 (84.9)        | 38 (90.5)        | 341 (84.8)       |         |                              |
| A/B1 lesion                | 207 (14.9)         | 21 (15.1)         | 4 (9.5)          | 61 (15.2)        |         |                              |
| Initial TIMI flow grade    |                    |                   |                  |                  | 0.734   | 0.466                        |
| 0–I                        | 498 (35.9)         | 46 (33.1)         | 17 (40.5)        | 140 (34.8)       |         |                              |
| II–III                     | 888 (64.1)         | 93 (66.9)         | 25 (59.5)        | 262 (65.2)       |         |                              |
| LMCA disease               | 103 (6.3)          | 13 (7.9)          | 5 (11.1)         | 33 (7.1)         | 0.401   | 0.364                        |
| MVD                        | 947 (57.6)         | 91 (55.2)         | 30 (66.7)        | 300 (64.2)       | 0.009   | 0.745                        |

**Supplementary Table 3. Continued**

| Characteristic        | Early presenters      |                      | Late presenters     |                     | <i>p</i> value | <i>p</i> value<br>(36–48 h<br>vs. ≥ 48 h) |
|-----------------------|-----------------------|----------------------|---------------------|---------------------|----------------|-------------------------------------------|
|                       | < 24 h<br>(n = 1,691) | 24–36 h<br>(n = 167) | 36–48 h<br>(n = 48) | ≥ 48 h<br>(n = 481) |                |                                           |
| Use of thrombolysis   | 0 (0.0)               | 0 (0.0)              | 0 (0.0)             | 0 (0.0)             | -              | -                                         |
| Discharge medications |                       |                      |                     |                     |                |                                           |
| Aspirin               | 1,680 (99.3)          | 166 (99.4)           | 48 (100.0)          | 476 (99.0)          | 0.437          | > 0.999                                   |
| P2Y12 inhibitors      | 1,671 (98.8)          | 163 (97.6)           | 47 (97.9)           | 477 (99.2)          | 0.673          | 0.380                                     |
| Beta-blockers         | 1,411 (83.4)          | 136 (81.4)           | 42 (87.5)           | 399 (83.0)          | 0.862          | 0.420                                     |
| RAS inhibitors        | 1,346 (79.6)          | 133 (79.6)           | 37 (77.1)           | 363 (75.5)          | 0.052          | 0.804                                     |
| Statins               | 1,525 (90.2)          | 152 (91.0)           | 47 (97.9)           | 425 (88.4)          | 0.339          | 0.047                                     |

Values are presented as number (percentage) for categorical values and mean ± standard deviation for continuous variables.

ACC/AHA, American College of Cardiology/American Heart Association; BMI, body mass index; CVA, cerebrovascular accident; DBT, door-to-balloon time; DM, diabetes mellitus; EMS, emergency medical service; IHD, ischemic heart disease; IRA, infarct-related artery; LAD, left anterior descending coronary artery; LCX, left circumflex coronary artery; LMCA, left main coronary artery; LVEF, left ventricular ejection fraction; MVD, multivessel disease; NSTEMI, non-ST-elevation myocardial infarction; PCI, percutaneous coronary intervention; RAS, renin-angiotensin system; RCA, right coronary artery; TIMI, thrombolysis in myocardial infarction.
